# Supplementary material for: Seipin deficiency-induced lipid dysregulation leads to hypomyelination-associated cognitive deficits via compromising oligodendrocyte precursor cell differentiation
Source: Springer Nature journal article supplement (doi:10.1038/s41419-024-06737-z), 2024-05-21
Supplement: MOESM1 [file 41419_2024_6737_MOESM1_ESM.pdf]

## Supplementary Figure and Figure Legends

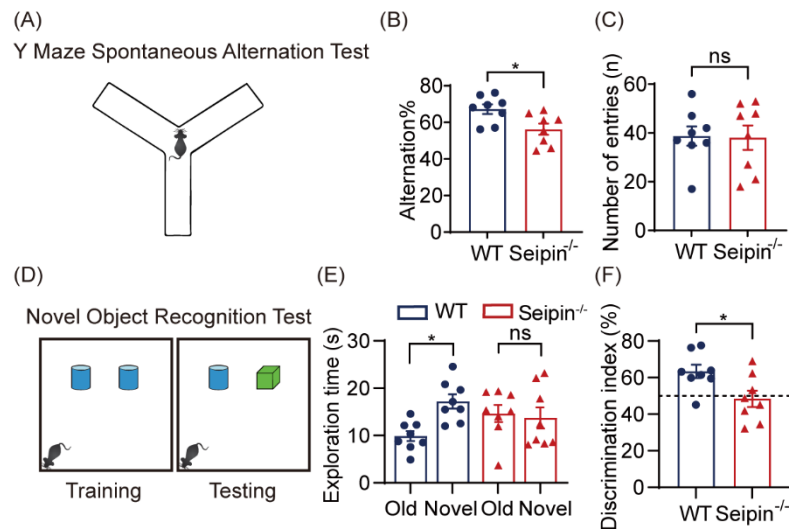

**Supplementary Figure 1 Cognitive impairments of Seipin<sup>-/-</sup> mice validated via Y-maze and novel object recognition assays.** **A** Schematic diagram of the Y-maze spontaneous alternation test. **B** Percentage of spontaneous alternation. **C** Total number of arm entries. **D** Schematic diagram of the novel object recognition test. **E** Total exploration time during testing. **F** Discrimination index during testing. Data are expressed as mean  $\pm$  s.e.m.  $n=8$ . ns, not significant; and  $*P < 0.05$ . (Unpaired student's  $t$ -tests).

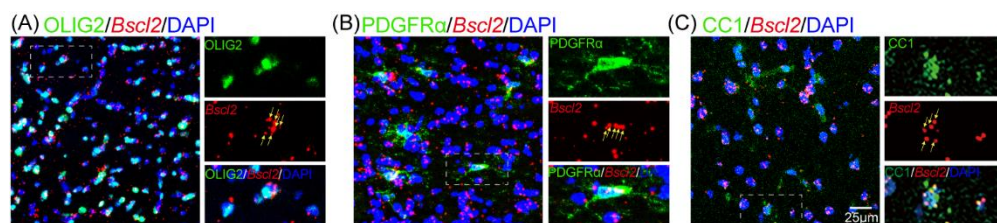

**Supplementary Figure 2 Seipin-encoded gene *Bsc12* was enriched in OPCs and OLs.**

**A-C** Representative images of *Bsc12* transcripts expression in OL lineage cells (**A**), OPCs (**B**), and OLs (**C**) of 5-month-old WT mice brain. Dashed boxed areas are enlarged. Yellow arrows indicate the *Bsc12* transcript signals.

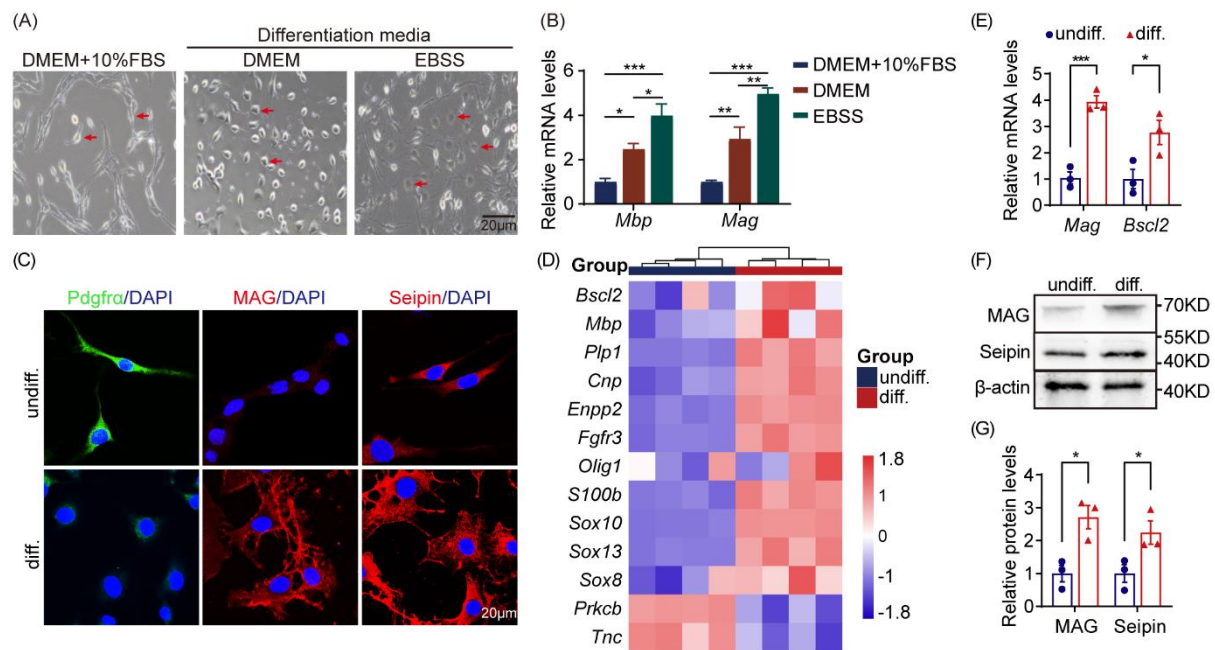

### Supplementary Figure 3 EBSS medium promoted OLN cell differentiation better

than serum-free medium. **A** Cell morphology of OLN-93 cells cultured on PDL-coated dishes

in three different media for 24 h. Undifferentiated OLN cells are bipolar; In DMEM

differentiation media, OLN cell bodies extended long bipolar or complex multipolar

processes; In EBSS, the cells displayed a more extensive arborization of their processes (red

arrows). **B** *Mbp* and *Mag* mRNA levels determined by qPCR in samples of OLN-93 cells

cultured in three different media for 24 h. **C** Representative images show PDGFR $\alpha$  (green),

MAG (red), and Seipin (red) expression in parallel with morphological changes of the diff- and

undiff-OLN cells. **D** Heatmap of differently expressed myelination-associated genes in

undifferentiated and differentiated OLN cells from transcriptome-sequencing data. **E-G**

Normalized mRNA levels (**E**), immunoblot blots (**F**), and densitometric analysis (**G**) of Seipin

and MAG in diff- and undiff-OLN cells. undiff.: undifferentiated. diff.: differentiated for 24 h.

Data are expressed as mean  $\pm$  s.e.m. n=4. \* $P < 0.05$ , \*\* $P < 0.01$  and \*\*\* $P < 0.001$ . (**B** One-

way ANOVA followed by Bonferroni's post hoc test; **E and G** Unpaired student's *t*-tests).

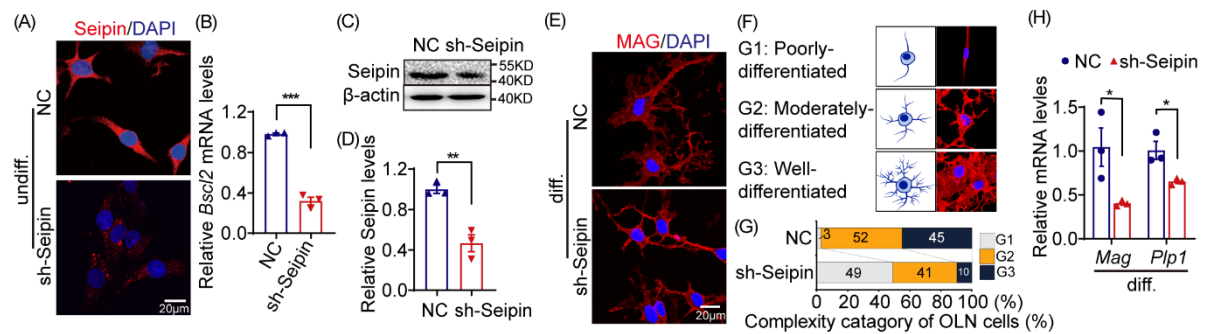

#### Supplementary Figure 4 Seipin knockdown inhibited OLN cell differentiation. A-D

Representative images (A), qPCR (B), western blotting (C) and densitometric analysis (D) show relative Seipin expression in OLN cells transfected with NC-shRNA or Seipin-shRNA for 72 h. E Representative images show different morphologies of NC and sh-Seipin cells with differentiation for 24 h. F Three differentiated categories of OLN cells. G Percentage histogram of histological categories of NC and sh-Seipin OLN cells before and after differentiation. H The mRNA levels of *Mag* and *Plp1* in differentiated NC and sh-Seipin OLN cells. undiff.: undifferentiated. diff.: differentiated for 24 h. NC: OLN cells transfected with NC-shRNA. Sh-Seipin: OLN cells transfected with Seipin-shRNA. n = 3 triplicate wells per group. \*  $P < 0.05$ , \*\*  $P < 0.01$ , \*\*\*  $P < 0.001$  (B, D and H Unpaired student's *t*-tests).

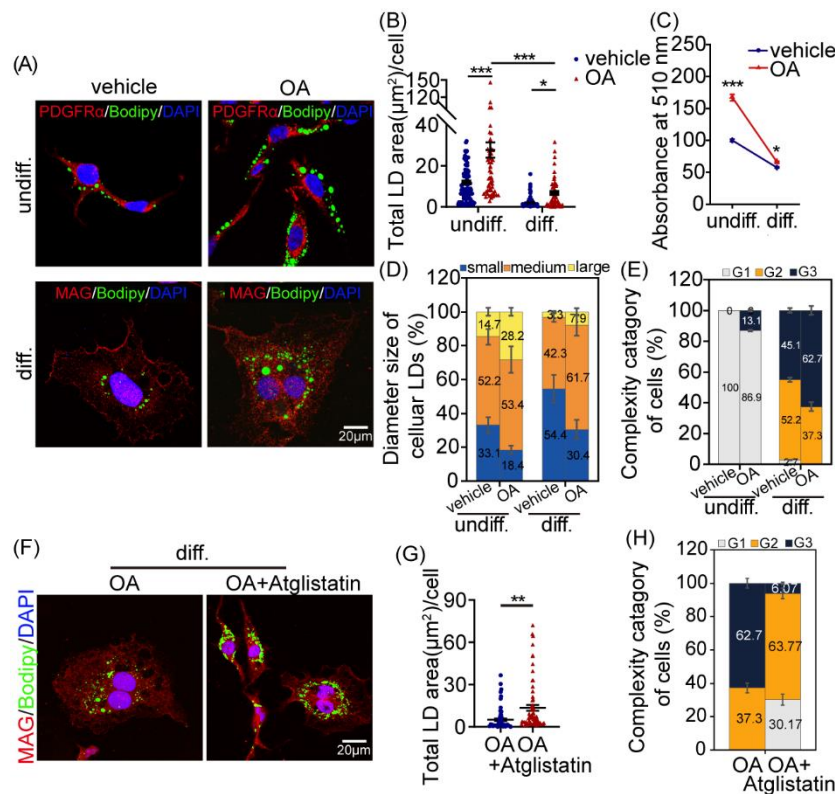

### Supplementary Figure 5 Manipulating LDs dynamics altered OLN cell differentiation.

**A** Representative images of OA-treated and vehicle-treated OLN cells before or after differentiation for 24 h. **B** Violin plots show LD area per cell in OA-treated and vehicle-treated OLN groups. **C** Quantification of ORO staining. **D** Distribution of different-sized LDs in OA-treated and vehicle-treated OLN cells before and after differentiation. **E** Percentage histogram of histological categories of OA-treated and vehicle-treated OLN cells before and after differentiation. **F** Representative images of differentiated OA and OA+Atglistatin cells. **G** Violin plots show the area of LDs in differentiated OA and OA+Atglistatin cells. **H** Percentage histogram of histological categories of differentiated OA and OA+Atglistatin cells. undiff.: undifferentiated. diff.: differentiated for 24 h. OA: OA-treated cells. OA+Atglistatin: OA-loaded cells treated with Atglistatin. \*  $P < 0.05$ , \*\*  $P < 0.01$ , \*\*\*  $P < 0.001$  (Unpaired student's t-tests).

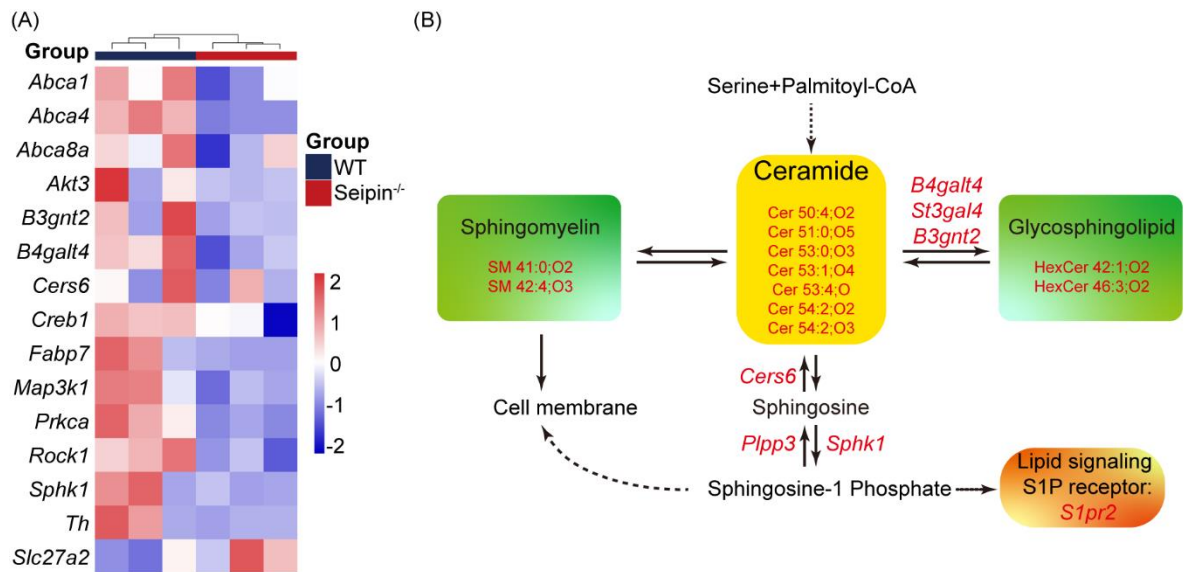

**Supplementary Figure 6** Seipin deficiency affected the expression of genes involved in lipid metabolism in brain of mice. **A** Heatmap of transcriptomic data showing changes in the expression of genes involved in lipid metabolism in brain of Seipin<sup>-/-</sup> mice compared to WT mice. **B** Schematic representation of the sphingolipid metabolism pathway. Genes and lipid metabolites in red are downregulated by Seipin deficiency.

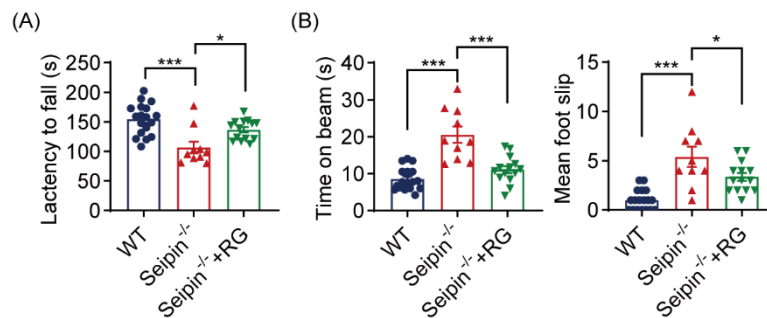

**Supplementary Figure 7** RG treatment rescued motor coordination deficits in Seipin<sup>-/-</sup> mice. **A** Latency to fall off in the rotarod test. **B** Time to cross the beam and number of foot slips in the beam walking test. Data are expressed as mean  $\pm$  s.e.m. n=10-18 mice per group. \* $P < 0.05$  and \*\*\* $P < 0.001$ . (One-way ANOVA followed by Bonferroni's post hoc test).
